# Supplementary material for: Genetic determinants of swimming motility in the squid light-organ symbiont Vibrio fischeri
Source: PubMed Central journal article supplement (PMC3948606; doi:10.1002/mbo3.96), 2013-06-12
Supplement: mbo30002-0576-sd1.pdf [file mbo30002-0576-sd1.pdf]

**Table S1. Strains and plasmids used in this study**

| Strain or Plasmid  | Description                                    | Reference or source        |
|--------------------|------------------------------------------------|----------------------------|
| Strains            |                                                |                            |
| <i>V. fischeri</i> |                                                |                            |
| MJM1100            | ES114, sequenced wild-type light organ isolate | (Boettcher and Ruby, 1990) |
| DM159              | $\Delta flrA::kan$                             | (Millikan and Ruby, 2003)  |
| CAB1625            | <i>fliL1::pCAB50</i> Campbell mutant           | This work                  |
| CAB1626            | <i>fliL2::pCAB51</i> Campbell mutant           | This work                  |
| CAB1627            | <i>motA1::pCAB52</i> Campbell mutant           | This work                  |
| CAB1628            | <i>motA2::pCAB53</i> Campbell mutant           | This work                  |
| CAB1629            | <i>motB2::pCAB54</i> Campbell mutant           | This work                  |
| CAB1630            | <i>motB1::pCAB55</i> Campbell mutant           | This work                  |
| MB06265            | <i>flgP::Tnerm</i>                             | This work                  |
| MB06357            | <i>motB1::Tnerm</i>                            | This work                  |
| MB06428            | <i>cheY::Tnerm</i>                             | This work                  |
| MB08164            | <i>flgI::Tnerm</i>                             | This work                  |
| MB08359            | <i>VF_0171::Tnerm</i>                          | This work                  |
| MB08380            | <i>rfbX::Tnerm</i>                             | This work                  |
| MB08627            | <i>VF_2581::Tnerm</i>                          | This work                  |
| MB08701            | <i>cheA::Tnerm</i>                             | This work                  |
| MB08705            | <i>VF_0173::Tnerm</i>                          | This work                  |
| MB08726            | <i>igVF_0135::Tnerm</i>                        | This work                  |
| MB08840            | <i>flhA::Tnerm</i>                             | This work                  |
| MB08886            | <i>flrC::Tnerm</i>                             | This work                  |
| MB08888            | <i>flil::Tnerm</i>                             | This work                  |
| MB09672            | <i>mutS::Tnerm</i>                             | This work                  |
| MB09956            | <i>flgH::Tnerm</i>                             | This work                  |
| MB10022            | 23s rRNA::Tnerm                                | This work                  |
| MB11332            | <i>VF_1697::Tnerm</i>                          | This work                  |
| MB12230            | <i>fliM::Tnerm</i>                             | This work                  |
| MB12341            | <i>flgK::Tnerm</i>                             | This work                  |
| MB12561            | <i>motX::Tnerm</i>                             | This work                  |
| MB13452            | <i>rffH::Tnerm</i>                             | This work                  |
| MB14051            | <i>VF_0172::Tnerm</i>                          | This work                  |
| MB14478            | <i>flgT::Tnerm</i>                             | This work                  |
| MB14580            | <i>flgE::Tnerm</i>                             | This work                  |
| MB14746            | <i>rmlB::Tnerm</i>                             | This work                  |
| MB15443            | <i>flhG::Tnerm</i>                             | This work                  |
| MB15490            | <i>VF_0192::Tnerm</i>                          | This work                  |
| MB15821            | <i>fliA::Tnerm</i>                             | This work                  |
| MB16040            | 23s rRNA::Tnerm                                | This work                  |
| MB16329            | <i>flgL::Tnerm</i>                             | This work                  |
| MB16504            | <i>flaA::Tnerm</i>                             | This work                  |
| MB16653            | <i>VF_0077::Tnerm</i>                          | This work                  |
| MB18981            | <i>fliG::Tnerm</i>                             | This work                  |
| MB19388            | <i>flhF::Tnerm</i>                             | This work                  |
| MB19520            | <i>fliL1::Tnerm</i>                            | This work                  |
| MB19624            | <i>cheW::Tnerm</i>                             | This work                  |
| MB20044            | <i>VF_A0058::Tnerm</i>                         | This work                  |
| MB20794            | <i>fliN::Tnerm</i>                             | This work                  |
| MB20979            | <i>cheZ::Tnerm</i>                             | This work                  |
| MB21386            | <i>flgO::Tnerm</i>                             | This work                  |
| MB21407            | <i>flrA::Tnerm</i>                             | This work                  |

|                    |                                                                    |                             |
|--------------------|--------------------------------------------------------------------|-----------------------------|
| MB21447            | <i>fliR</i> ::T <sub>term</sub>                                    | This work                   |
| MB21566            | <i>flgN</i> ::T <sub>term</sub>                                    | This work                   |
| MB22953            | <i>fliF</i> ::T <sub>term</sub>                                    | This work                   |
| MB23025            | <i>flgF</i> ::T <sub>term</sub>                                    | This work                   |
| MB23130            | <i>mshB</i> ::T <sub>term</sub>                                    | This work                   |
| MB23533            | <i>flgG</i> ::T <sub>term</sub>                                    | This work                   |
| MB23837            | <i>cheB</i> ::T <sub>term</sub>                                    | This work                   |
| MB24277            | <i>VF_1491</i> ::T <sub>term</sub>                                 | This work                   |
| MB24439            | <i>flaD</i> ::T <sub>term</sub>                                    | This work                   |
| MB24714            | <i>flrB</i> ::T <sub>term</sub>                                    | This work                   |
| MB25656            | 16s rRNA::T <sub>term</sub>                                        | This work                   |
| MB26712            | <i>motY</i> ::T <sub>term</sub>                                    | This work                   |
| MB26857            | 16s rRNA::T <sub>term</sub>                                        | This work                   |
| MB27080            | <i>fliD</i> ::T <sub>term</sub>                                    | This work                   |
| MB28068            | ig <i>VF_1874</i> ::T <sub>term</sub>                              | This work                   |
| MB28468            | <i>flgD</i> ::T <sub>term</sub>                                    | This work                   |
| MB28617            | 23s rRNA::T <sub>term</sub>                                        | This work                   |
| MB28641            | <i>motA1</i> ::T <sub>term</sub>                                   | This work                   |
| MB29802            | <i>fliK</i> ::T <sub>term</sub>                                    | This work                   |
| MB30445            | <i>rpoN</i> ::T <sub>term</sub>                                    | This work                   |
| MB30578            | <i>fliH</i> ::T <sub>term</sub>                                    | This work                   |
| MB31054            | ig <i>VF_1837</i> ::T <sub>term</sub>                              | This work                   |
| MB31274            | <i>mukF</i> ::T <sub>term</sub>                                    | This work                   |
| MB32667            | <i>can</i> ::T <sub>term</sub>                                     | This work                   |
| MB32946            | <i>amiB</i> ::T <sub>term</sub>                                    | This work                   |
| MB33180            | 16s rRNA::T <sub>term</sub>                                        | This work                   |
| MB33191            | <i>VF_0189</i> ::T <sub>term</sub>                                 | This work                   |
| MB33314            | <i>mukB</i> ::T <sub>term</sub>                                    | This work                   |
| MB33650            | <i>VF_0174</i> ::T <sub>term</sub>                                 | This work                   |
| <i>E. coli</i>     |                                                                    |                             |
| DH5 $\alpha$ -Apir | Cloning strain                                                     | (Hanahan, 1983)             |
| Plasmids           |                                                                    |                             |
| pMJM10             | Plasmid used for T <sub>term</sub> transposition, kan <sup>R</sup> | This work                   |
| pEVS122            | <i>oriR6K</i> -based suicide vector, erm <sup>R</sup>              | (Dunn <i>et al.</i> , 2005) |
| pVSV105            | pES213-based plasmid used for complementation, cam <sup>R</sup>    | (Dunn <i>et al.</i> , 2006) |
| pAKD701            | pES213-based plasmid used for reporter fusions, kan <sup>R</sup>   | (Dunn and Stabb, 2008)      |
| pEVS104            | conjugative helper plasmid, kan <sup>R</sup>                       | (Stabb and Ruby, 2002)      |
| pCAB52             | pEVS122 containing a fragment of <i>motA1</i> ORF                  | This work                   |
| pCAB55             | pEVS122 containing a fragment of <i>motB1</i> ORF                  | This work                   |
| pCAB53             | pEVS122 containing a fragment of <i>motA2</i> ORF                  | This work                   |
| pCAB54             | pEVS122 containing a fragment of <i>motB2</i> ORF                  | This work                   |
| pCAB50             | pEVS122 containing a fragment of <i>fliL1</i> ORF                  | This work                   |
| pCAB51             | pEVS122 containing a fragment of <i>fliL2</i> ORF                  | This work                   |
| pCAB11             | pVSV105 with the <i>flgOP</i> complementing fragment               | This work                   |
| pCAB12             | pVSV105 with the <i>flgP</i> complementing fragment                | This work                   |
| pCAB60             | pVSV105 with the <i>flgT</i> complementing fragment                | This work                   |
| pCAB58             | pVSV105 with the <i>VF_1491</i> complementing fragment             | This work                   |
| pCAB59             | pVSV105 with the <i>amiB</i> complementing fragment                | This work                   |

---

|        |                                                      |           |
|--------|------------------------------------------------------|-----------|
| pCAB66 | pVSV105 with the <i>mukB</i> complementing fragment  | This work |
| pCAB65 | pVSV105 with the <i>mutS</i> complementing fragment  | This work |
| pCAB56 | pVSV105 with the <i>flil2</i> complementing fragment | This work |
| pCAB36 | pAKD701 with the <i>fliE</i> promoter                | This work |
| pCAB37 | pAKD701 with the <i>flhA</i> promoter                | This work |
| pCAB38 | pAKD701 with the <i>flrB</i> promoter                | This work |
| pCAB39 | pAKD701 with the <i>fliK</i> promoter                | This work |
| pCAB47 | pAKD701 with the <i>flgA</i> promoter                | This work |
| pCAB40 | pAKD701 with the <i>flgB</i> promoter                | This work |
| pCAB44 | pAKD701 with the <i>flaD</i> promoter                | This work |
| pCAB41 | pAKD701 with the <i>motX</i> promoter                | This work |
| pCAB46 | pAKD701 with the <i>motA1</i> promoter               | This work |
| pCAB48 | pAKD701 with the <i>flgO</i> promoter                | This work |
| pCAB49 | pAKD701 with the <i>flgT</i> promoter                | This work |

---
