# Supplementary material for: Genetic determinants of swimming motility in the squid light-organ symbiont Vibrio fischeri
Source: PubMed Central journal article supplement (PMC3948606; doi:10.1002/mbo3.96), 2013-06-12
Supplement: mbo30002-0576-sd2.pdf [file mbo30002-0576-sd2.pdf]

**Table S2. Primers used in this study**

| <b>Primer name</b> | <b>Sequence (5'-3')</b>                                         |
|--------------------|-----------------------------------------------------------------|
| T7US-F2            | CTAGATAATACGACTCACTATAGGGCGGCC                                  |
| T7US-R2            | GCCCTATAGTGAGTCGTATTAT                                          |
| MseTspUS-F         | GAGACAGGTCGACCTGCAGGGTTAATTGGGAAAGCCACGTTGTGTCTC                |
| MseTspUS-R         | GAGACACAACGTGGCTTTCCCAATTAACCCTGCAGGTCGACCTGTCTC                |
| T7DS-pcrF2         | GAGGATGTCGGTACCCCTATAGTGAGTCGTATTAGTACAACCTGAG                  |
| T7DS-pcrR          | GTGACGTCAGGTACCAGATGTGTATAAGAGACAGAATTAATCCGTAGCGTCC<br>TGAACGG |
| 170Int2            | AGCTTGCTCAATCAATCACC                                            |
| ARB1               | GGCCACGCGTCGACTAGTACNNNNNNNNNGATAT                              |
| 170Ext3            | GCAGTTCAACCTGTTGATAGTACG                                        |
| ARB2               | GGCCACGCGTCGACTAGTAC                                            |
| 170Int3            | CAAAGCAATTTTGGTGCACACAGG                                        |
| 170Seq1            | AACACTTAACGGCTGACA                                              |
| fliL1_campbellF    | GCCCCGGGTGCCGCTTTAGAAGCGAATATGCC                                |
| fliL1_campbellR    | GCGCATGCTTCGGCCACGTGGTTCTCTTAACT                                |
| fliL2_campbellF    | GCCCCGGGAGAAGTCGCACCTCAAATGGGCTA                                |
| fliL2_campbellR    | GCGCATGCTCTTATTTCTTCACGACCCGCCAG                                |
| motA1_campbellF    | GCCCCGGGCAATGGTACTGGCTGGTGGTATA                                 |
| motA1_campbellR    | GCGCATGCCTTTACGAGCCGCATCAGCCATTT                                |
| motB1_campbellF    | GCCCCGGGATTGATGGAGAATCGGATCGTGCTG                               |
| motB1_campbellR    | GCGCATGCCACTAATCTCGCGCTCTAGTGCTT                                |
| motA2_campbellF    | GCCCCGGGCGGCTTATTGATGGCGTTTGGTGT                                |
| motA2_campbellR    | GCGCATGCTCGTCACGTTTGTCTCGTCAAGCA                                |
| motB2_campbellF    | GCCCCGGGAAAGTGGTTGATACGTCCGGCTCAC                               |
| motB2_campbellR    | GCGCATGCCGACCTCTTTCATCGCTTCTGAA                                 |
| flgO_compF         | GCTCTAGAACTTAAGATCCTTTAGGCGGC                                   |
| flgP_compR         | GCTCTAGACTAACACACAGGAAACAGCTATGAAACATTGGTTTTTTATTA              |
| flgP_compF         | GCGGTACCACCGAGGGCAATAGCATTATGTCC                                |
| flgT_compF         | GCTCTAGATGGCAATTGGTGAACGAGCA                                    |
| flgT_compR         | GCGGTACCAACAACACGCTAGGCACTGT                                    |
| 1491_compF         | GCTCTAGAGCAGTCGATGATACATTCAAACCTGTG                             |
| 1491_compR         | GCGAGCTCTCCACAGTGGTGTTCCTGTT                                    |
| amiB_compF         | GCTCTAGACTAACACACAGGAAACAGCTGTGTTAATCGGTAAATATTTTCGA            |
| amiB_compR         | GCGGTACCTTGGTTGGCTAATCGTGCTGGT                                  |
| mukB_compF         | CCTAACACACAGGAAACAGCTATGATTGAACGTGGTAAATA                       |
| mukB_compR         | ACGCATTCCGCTTCTGTTGT                                            |
| mutS_compF         | AACTTCTTCACTAACC GCGCCA                                         |
| mutS_compR         | TGGCTGATTCATGGCTGCAT                                            |
| fliL2_compF        | GCTCTAGAACCACGATTGCTGATCACCTT                                   |
| fliL2_compR        | GCGGTACCACAGCGCATTTAGCAGGCTT                                    |
| fliE_fusionF       | GCCCTAGGACCAGAGCAACAAGTACCGT                                    |
| fliE_fusionR       | GCGTCGACTTAGGCTTTTCGCAAACATTGCA                                 |
| fliH_fusionF       | GCCCTAGGGACGCGACTACCAATATCCA                                    |
| fliH_fusionR       | GCGTCGACTTACGGTATGGGTTAAATTACCA                                 |
| fliR_fusionF       | GCCCTAGGTCTGAATGATTTACCAGAAGA                                   |
| fliR_fusionR       | GCGTCGACTTACTTGTGTATCAAGTAAATAACA                               |

---

|               |                                      |
|---------------|--------------------------------------|
| fliK_fusionF  | GCCCTAGGTCACAAGTGGATAATTGCCA         |
| fliK_fusionR  | GCGTCGACTTACTCTTTTAGCTCTTCAATAAAGCCT |
| flgA_fusionF  | GCCCTAGGAGAAACCTTGAATTGTACGGT        |
| flgA_fusionR  | GCGTCGACTTAGAAACTTATAAATAGGCCGA      |
| flgB_fusionF  | GCCCTAGGTGAAATCTCAAGTGTTAAATCA       |
| flgB_fusionR  | GCGTCGACTTATGCTTTATAGCGAGGAGT        |
| flaD_fusionF  | GCCCTAGGACTATGCCAAAGCCGGGGCT         |
| flaD_fusionR  | GCGTCGACTTAACTGTTAATTTTAAGACCTGA     |
| motX_fusionF  | GCCCTAGGTGAAGATCTAACAGGCGTGCCA       |
| motX_fusionR  | GCGTCGACTTAAAACAGTCGAAATAATTGGT      |
| motA1_fusionF | GCCCTAGGTTGATTGACGACAGAATCCA         |
| motA1_fusionR | GCGTCGACTTAACCAACTACGATTTAAAACCGA    |
| flgO_fusionF  | GCCCTAGGTATCGGCCCCAGAAAAACAGCA       |
| flgO_fusionR  | GCGTCGACTTAGCGTGGGGTATCAGCCAGCA      |
| flgT_fusionF  | GCCCTAGGGTCGTATTTCGATGTTACAAACTGTTCA |
| flgT_fusionR  | GCGTCGACTTATGCCGCATCTTTACTGGTTAAGA   |

---
