# Supplementary material for: Genetic determinants of swimming motility in the squid light-organ symbiont Vibrio fischeri
Source: PubMed Central journal article supplement (PMC3948606; doi:10.1002/mbo3.96), 2013-06-12
Supplement: mbo30002-0576-sd3.pdf [file mbo30002-0576-sd3.pdf]

**Table S3. All genes differentially regulated in the absence of FlrA**

| <b>Locus Tag</b> | <b>Fold change</b> | <b>Gene</b>  | <b>Description</b>                                     |
|------------------|--------------------|--------------|--------------------------------------------------------|
| VF_0094          | 5.7                |              | Diguanylate cyclase                                    |
| VF_0714          | 6.3                | <i>motA1</i> | Flagellar motor protein                                |
| VF_0715          | 3.4                | <i>motB1</i> | Flagellar motor protein                                |
| VF_0777          | 10.2               |              | Methyl-accepting chemotaxis protein                    |
| VF_0915          | 4.5                |              | Hypothetical protein                                   |
| VF_0920          | 49.5               |              | Hypothetical protein                                   |
| VF_0926          | 2.6                | <i>motY</i>  | Flagellar motor protein                                |
| VF_1125          | 2.5                |              | Hypothetical protein                                   |
| VF_1330          | 2.5                |              | Carbohydrate binding domain-containing protein         |
| VF_1422          | 2.2                |              | von Willebrand factor type A domain protein            |
| VF_1427          | 2.2                | <i>asIA</i>  | Acrylsulfatase like protein                            |
| VF_1493          | 2.6                |              | Hypothetical protein                                   |
| VF_1556          | 3.4                | <i>pIdA</i>  | Outer membrane phospholipase A                         |
| VF_1559          | 2.4                |              | Hypothetical protein                                   |
| VF_1771          | 2.2                | <i>prkA</i>  | Serine kinase                                          |
| VF_1774          | 2.3                | <i>ycgB</i>  | SpoVR family protein                                   |
| VF_1789          | 17.4               |              | Methyl-accepting chemotaxis protein                    |
| VF_1827          | 2.6                | <i>cheW</i>  | Chemotaxis coupling protein                            |
| VF_1829          | 2.3                | <i>parA2</i> | Chromosome partitioning protein                        |
| VF_1830          | 2.1                | <i>cheB</i>  | Chemotaxis methyl esterase                             |
| VF_1831          | 2.0                | <i>cheA</i>  | Chemotaxis histidine kinase                            |
| VF_1832          | 2.2                | <i>cheZ</i>  | Chemotaxis phosphatase                                 |
| VF_1833          | 2.2                | <i>cheY</i>  | Chemotaxis response regulator                          |
| VF_1836          | 2.6                | <i>flhF</i>  | Flagellar regulator                                    |
| VF_1839          | 2.3                | <i>flhB</i>  | Flagellar biosynthesis protein                         |
| VF_1840          | 2.9                | <i>fliR</i>  | Flagellar biosynthesis protein                         |
| VF_1841          | 3.9                | <i>fliQ</i>  | Flagellar biosynthesis protein                         |
| VF_1842          | 3.2                | <i>fliP</i>  | Flagellar biosynthesis protein                         |
| VF_1843          | 7.1                | <i>fliO</i>  | Flagellar biosynthesis protein                         |
| VF_1844          | 6.4                | <i>fliN</i>  | Flagellar motor switch component                       |
| VF_1845          | 6.8                | <i>fliM</i>  | Flagellar motor switch protein                         |
| VF_1846          | 8.1                | <i>fliL1</i> | Flagellar basal body-associated protein                |
| VF_1847          | 9.2                | <i>fliK</i>  | Flagellar hook length control protein                  |
| VF_1851          | 6.7                | <i>fliG</i>  | Flagellar motor switch protein                         |
| VF_1852          | 6.6                | <i>fliF</i>  | Flagellar M-ring protein                               |
| VF_1853          | 16.1               | <i>fliE</i>  | Flagellar hook-basal body protein                      |
| VF_1854          | 8.1                | <i>fliR</i>  | Flagellar two-component response regulator             |
| VF_1855          | 16.1               | <i>fliB</i>  | Flagellar two-component sensor kinase                  |
| VF_1856          | 17.5               | <i>fliA</i>  | Flagellar sigma-54-dependent transcriptional activator |
| VF_1858          | 8.8                | <i>fliS</i>  | Flagellin chaperone                                    |
| VF_1859          | 8.4                | <i>fliA</i>  | Flagellar protein                                      |
| VF_1860          | 7.4                | <i>fliD</i>  | Flagellar hook-associated protein 2                    |
| VF_1861          | 22.7               | <i>fliG</i>  | Flagellar protein                                      |
| VF_1862          | 43.3               | <i>fliE</i>  | Flagellin                                              |
| VF_1863          | 51.5               | <i>fliD</i>  | Flagellin                                              |
| VF_1864          | 19.7               | <i>fliC</i>  | Flagellin                                              |
| VF_1865          | 5.1                | <i>fliB</i>  | Flagellin                                              |
| VF_1866          | 32.0               | <i>fliA</i>  | Flagellin                                              |
| VF_1867          | 8.7                | <i>fliL</i>  | Flagellar hook-associated protein 3                    |
| VF_1868          | 41.3               | <i>fliK</i>  | Flagellar hook-associated protein 1                    |
| VF_1869          | 12.7               | <i>fliJ</i>  | Flagellum-specific peptidoglycan hydrolase             |

---

|          |      |              |                                                 |
|----------|------|--------------|-------------------------------------------------|
| VF_1870  | 3.5  | <i>flgI</i>  | Flagellar P-ring protein                        |
| VF_1871  | 6.3  | <i>flgH</i>  | Flagellar L ring protein                        |
| VF_1872  | 12.3 | <i>flgG</i>  | Flagellar distal rod protein                    |
| VF_1873  | 9.6  | <i>flgF</i>  | Flagellar proximal rod protein                  |
| VF_1874  | 5.7  | <i>flgE</i>  | Flagellar hook protein                          |
| VF_1875  | 7.5  | <i>flgD</i>  | Flagellar hook capping protein                  |
| VF_1876  | 8.5  | <i>flgC</i>  | Flagellar proximal rod protein                  |
| VF_1877  | 8.2  | <i>flgB</i>  | Flagellar proximal rod protein                  |
| VF_1882  | 2.5  | <i>flgN</i>  | Chaperone                                       |
| VF_1883  | 8.7  | <i>flgP</i>  | Flagellar motility-associate protein            |
| VF_1884  | 10.1 | <i>flgO</i>  | Flagellar motility-associate protein            |
| VF_2009  | 3.3  |              | Hypothetical protein                            |
| VF_2010  | 2.4  |              | Hypothetical protein                            |
| VF_2011  | 2.2  |              | Hypothetical protein                            |
| VF_2012  | 2.3  |              | Major capsid protein                            |
| VF_2013  | 3.3  |              | Probable capsid scaffolding protein             |
| VF_2015  | 2.9  |              | Capsid scaffolding protein                      |
| VF_2016  | 2.5  |              | Hypothetical protein                            |
| VF_2017  | 2.9  |              | L-alanyl-D-glutamate peptidase                  |
| VF_2025  | 2.9  |              | Phage baseplate assembly protein                |
| VF_2026  | 2.6  |              | Phage tail protein                              |
| VF_2027  | 3.1  |              | Hypothetical protein                            |
| VF_2029  | 2.0  |              | Hypothetical protein                            |
| VF_2031  | 2.4  |              | Conserved hypothetical protein                  |
| VF_2033  | 3.2  |              | Hypothetical bacteriophage protein              |
| VF_2034  | 3.2  |              | Hypothetical protein                            |
| VF_2035  | 2.5  |              | Hypothetical protein                            |
| VF_2036  | 3.4  |              | Phage regulatory protein (CII)                  |
| VF_2079  | 12.1 | <i>flaF</i>  | Flagellin                                       |
| VF_2317  | 11.1 | <i>motX</i>  | Flagellar motor protein                         |
| VF_2446  | 2.2  | <i>fliL2</i> | Flagellar basal body-associated protein         |
| VF_A0071 | 2.3  | <i>hnoX</i>  | Heme nitric oxide binding protein               |
| VF_A0287 | 16.1 |              | Hypothetical protein                            |
| VF_A0325 | 5.9  |              | Methyl-accepting chemotaxis protein             |
| VF_A0502 | 6.3  |              | Hypothetical protein                            |
| VF_A0564 | 11.2 | <i>traF</i>  | TraF protein                                    |
| VF_A0677 | 10.3 |              | Methyl-accepting chemotaxis protein             |
| VF_A0715 | 7.5  |              | Chitodextrinase precursor                       |
| VF_A0788 | 2.7  |              | Hypothetical protein                            |
| VF_A0802 | 2.7  | <i>cheV2</i> | CheW/CheY hybrid                                |
| VF_A0834 | 9.7  |              | NirV precursor                                  |
| VF_A0856 | 6.7  |              | Hypothetical protein                            |
| VF_A1014 | 4.2  |              | Diguanylate phosphodiesterase                   |
| VF_A1015 | 4.3  | <i>rpoQ</i>  | Quorum-sensing regulated RpoS-like sigma factor |
| VF_A1016 | 2.4  |              | Two-component sensory histidine kinase          |
| VF_A1017 | 2.7  |              | Two-component response regulator                |
| VF_B20   | 3.5  |              | Hypothetical protein                            |
| VF_B21   | 4.8  |              | Hypothetical protein                            |
| VF_B22   | 3.0  |              | Hypothetical protein                            |
| VF_B23   | 3.6  |              | Hypothetical protein                            |
| VF_B24   | 3.8  |              | Hypothetical protein                            |
| VF_B25   | 3.4  |              | Hypothetical protein                            |
| VF_B26   | 3.1  |              | Hypothetical protein                            |
| VF_B27   | 3.9  |              | Hypothetical protein                            |
| VF_B28   | 3.6  |              | Hypothetical protein                            |
| VF_B29   | 3.4  | <i>sbcC</i>  | Exonuclease                                     |

---

|          |      |             |                                                    |
|----------|------|-------------|----------------------------------------------------|
| VF_B30   | 3.1  |             | Hypothetical protein                               |
| VF_B31   | 3.4  |             | Hypothetical protein                               |
| VF_B32   | 3.3  |             | Transporter                                        |
| VF_B33   | 3.0  |             | Hypothetical protein                               |
| VF_B34   | 2.9  |             | Hypothetical protein                               |
| VF_B37   | 2.9  |             | Hypothetical protein                               |
| VF_B38   | 3.4  |             | Attachment mediating VirB2-like protein            |
| VF_B39   | 2.7  |             | VirB4 ATPase                                       |
| VF_B40   | 4.0  |             | Channel protein VirB8                              |
| VF_B41   | 3.0  |             | Channel protein VirB9                              |
| VF_B42   | 3.2  |             | Channel protein VirB10                             |
| VF_B43   | 2.6  |             | VirB11 ATPase                                      |
| VF_B44   | 2.8  |             | Protein VirD4                                      |
| VF_B45   | 3.1  |             | Single-strand DNA binding protein                  |
| VF_B46   | 4.3  |             | DNA topoisomerase III                              |
| VF_B47   | 3.6  |             | Outer membrane protein                             |
| VF_B48   | 4.1  |             | Hypothetical protein                               |
| VF_B49   | 3.2  |             | Hypothetical protein                               |
| VF_B50   | 2.7  |             | Relaxase                                           |
| VF_B51   | 2.8  |             | Hypothetical protein                               |
| VF_B52   | 2.8  |             | Hypothetical protein                               |
| VF_B53   | 3.0  |             | Hypothetical protein                               |
| VF_B54   | 3.3  |             | Attachment mediating VirB5-like protein            |
| VF_B55   | 2.5  |             | Channel protein VirB6                              |
| VF_0349  | -2.2 |             | Chain length regulator, EPS biosynthesis protein   |
| VF_0350  | -2.2 |             | Polysaccharide export periplasmic protein          |
| VF_0352  | -3.0 |             | UDP-glucose lipid carrier transferase              |
| VF_0510  | -3.7 |             | Fimbrial protein                                   |
| VF_A0191 | -2.4 |             | FhuE receptor precursor                            |
| VF_A0193 | -2.0 |             | TolQ protein                                       |
| VF_A0199 | -2.1 | <i>oppD</i> | Chitooligosaccharide transport ATP-binding protein |
| VF_A0328 | -2.1 | <i>yiaD</i> | Outer membrane lipoprotein                         |
| VF_A0329 | -3.4 |             | Hypothetical protein                               |
| VF_A0330 | -3.0 |             | Hypothetical protein                               |
| VF_A0331 | -2.6 |             | Hypothetical protein                               |
| VF_A0332 | -2.7 |             | TonB system receptor                               |
| VF_A0333 | -2.5 | <i>ptrB</i> | Oligopeptidase B                                   |
| VF_A0610 | -2.5 |             | Hypothetical protein                               |
| VF_A0848 | -2.4 |             | Hypothetical protein                               |
| VF_A0885 | -2.3 |             | Hypothetical protein                               |
| VF_A1038 | -2.1 |             | Diguanylate phosphodiesterase                      |

<sup>a</sup> Fold change of wild-type expression relative to  $\Delta flrA$  condition, (*i.e.*, positive values indicate putative activation by FlrA)
